# Supplementary material for: Identification of Muscle Strength-Related Gut Microbes through Human Fecal Microbiome Transplantation
Source: MDPI journal article supplement (doi:10.3390/ijms25010662), 2024-01-04
Supplement: s1 [file s1]

# Supplementary Information

## Supplemental Figures

Figure S1

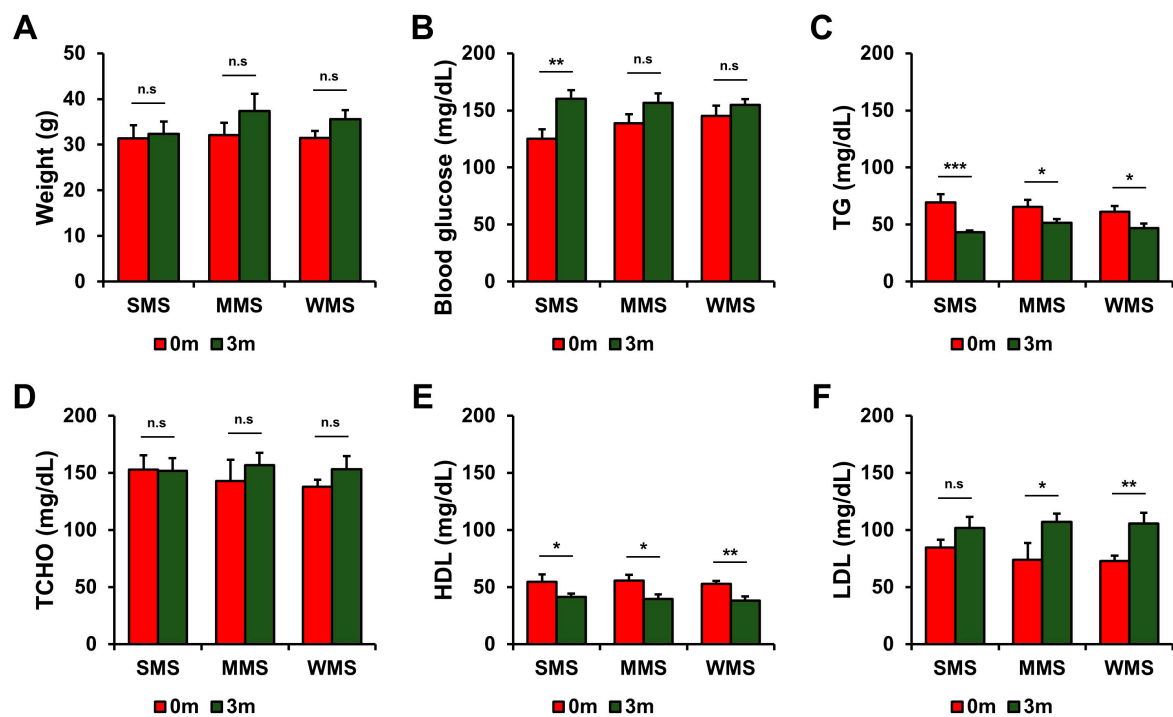

**Figure S1. The effects of FMT on changes in blood glucose, blood pressure, and lipid levels.**

The average values of (A) Weight, (B) Blood glucose, (C) Total glycerol (TG), (D) Total cholesterol (TCHO), (E) HDL-cholesterol (HDL-CHO), and (F) LDL-cholesterol (LDL-CHO) for each group are shown. The values are represented as mean  $\pm$  SEM. 0m represents before the FMT, and 3m represents 3 months after the FMT. \* $p < 0.05$ ; \*\* $p < 0.01$ ; \*\*\* $p < 0.001$ ; n.s.: not significant ( $p > 0.05$ )

### Figure S2

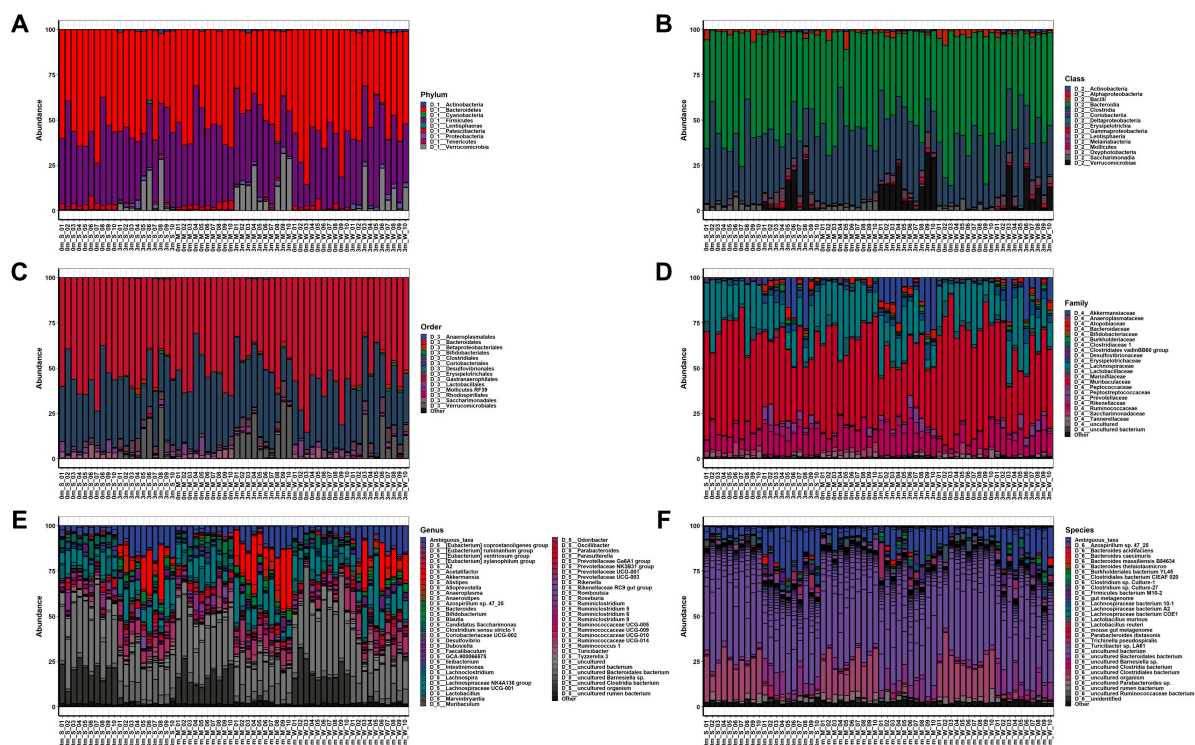

**Figure S2. Changes in the composition of the gut microbiome of each mouse before and after FMT.** The compositional changes of the gut microbiome at **(A)** phylum level, **(B)** class level, **(C)** order level, **(D)** family level, **(E)** genus, and **(F)** species level are shown. 0m represents before the FMT, and 3m represents 3 months after the FMT. S, M, and W represent the SMS group, MMS group, and WMS group respectively.

**Table S1. The valid reads of the 16S rRNA amplicon sequence**

| <b>Group</b>       | <b>0m_S</b>       | <b>0m_M</b>       | <b>0m_W</b>       | <b>3m_S</b>       | <b>3m_M</b>       | <b>3m_W</b>       |
|--------------------|-------------------|-------------------|-------------------|-------------------|-------------------|-------------------|
| <b>Total reads</b> | 41,550<br>± 1,113 | 44,773<br>± 2,565 | 46,584<br>± 1,215 | 39,230<br>± 2,515 | 40,207<br>± 1,718 | 36,142<br>± 2,031 |

All values are the mean ± SEM. 0m represents before the FMT, and 3m represents 3 months after the FMT. S, M, and W represent the SMS group, MMS group, and WMS group respectively.

**Table S2. Comparison of taxonomy abundance at the phylum level**

| Phylum             | 0m_S   | 0m_M   | 0m_W   | 3m_S   | 3m_M   | 3m_W   | 0m     | 3m     |
|--------------------|--------|--------|--------|--------|--------|--------|--------|--------|
| D__Verrucomicrobia | 0      | 0      | 0.017  | 7.552  | 14.915 | 8.123  | 0.006  | 10.197 |
| D__Bacteroidetes   | 56.093 | 53.922 | 63.633 | 52.068 | 43.928 | 49.416 | 57.883 | 48.471 |
| D__Firmicutes      | 40.116 | 42.569 | 33.938 | 36.244 | 37.628 | 38.496 | 38.875 | 37.456 |
| D__Patescibacteria | 3.240  | 2.791  | 2.030  | 0.510  | 0.373  | 0.129  | 2.687  | 0.337  |
| D__Actinobacteria  | 0.055  | 0.266  | 0.074  | 0.929  | 0.698  | 1.093  | 0.132  | 0.907  |
| D__Proteobacteria  | 0.336  | 0.335  | 0.253  | 1.835  | 1.671  | 2.264  | 0.308  | 1.924  |
| D__Tenericutes     | 0.158  | 0.115  | 0.055  | 0.629  | 0.574  | 0.236  | 0.109  | 0.480  |
| D__Cyanobacteria   | 0.003  | 0.001  | 0      | 0.232  | 0.210  | 0.241  | 0.001  | 0.228  |
| D__Lentisphaerae   | 0      | 0      | 0      | 0.001  | 0.002  | 0.002  | 0      | 0.002  |

0m represents before the FMT, and 3m represents 3 months after the FMT. S, M, and W represent the SMS group, MMS group, and WMS group respectively.

**Table S3. Comparison of taxonomy abundance at the class level**

| Class                  | 0m_S   | 0m_M   | 0m_W   | 3m_S   | 3m_M   | 3m_W   | 0m     | 3m     |
|------------------------|--------|--------|--------|--------|--------|--------|--------|--------|
| D__Verrucomicrobiae    | 0      | 0      | 0.017  | 7.552  | 14.915 | 8.123  | 0.006  | 10.197 |
| D__Bacteroidia         | 56.093 | 53.922 | 63.633 | 52.068 | 43.928 | 49.416 | 57.883 | 48.471 |
| D__Clostridia          | 36.684 | 38.674 | 29.873 | 30.437 | 32.948 | 32.293 | 35.077 | 31.893 |
| D__Erysipelotrichia    | 0.943  | 1.396  | 0.695  | 4.538  | 3.467  | 4.969  | 1.011  | 4.325  |
| D__Saccharimonadia     | 3.240  | 2.791  | 2.030  | 0.510  | 0.373  | 0.129  | 2.687  | 0.337  |
| D__Bacilli             | 2.489  | 2.499  | 3.370  | 1.269  | 1.211  | 1.234  | 2.786  | 1.238  |
| D__Actinobacteria      | 0      | 0.193  | 0.004  | 0.735  | 0.515  | 0.846  | 0.066  | 0.699  |
| D__Coriobacteriia      | 0.055  | 0.074  | 0.070  | 0.194  | 0.183  | 0.247  | 0.066  | 0.208  |
| D__Deltaproteobacteria | 0.142  | 0.193  | 0.124  | 0.245  | 0.306  | 0.371  | 0.153  | 0.308  |
| D__Gammaproteobacteria | 0.134  | 0.097  | 0.089  | 1.211  | 1.016  | 1.438  | 0.107  | 1.222  |
| D__Mollicutes          | 0.158  | 0.115  | 0.055  | 0.629  | 0.574  | 0.236  | 0.109  | 0.480  |
| D__Alphaproteobacteria | 0.060  | 0.045  | 0.039  | 0.379  | 0.349  | 0.455  | 0.048  | 0.394  |
| D__Melainabacteria     | 0      | 0      | 0      | 0.230  | 0.206  | 0.239  | 0      | 0.225  |
| D__Oxyphotobacteria    | 0.003  | 0.001  | 0      | 0.002  | 0.004  | 0.002  | 0.001  | 0.003  |
| D__Lentisphaeria       | 0      | 0      | 0      | 0.001  | 0.002  | 0.002  | 0      | 0.002  |

0m represents before the FMT, and 3m represents 3 months after the FMT. S, M, and W represent the SMS group, MMS group, and WMS group respectively.

**Table S4. Comparison of taxonomy abundance at the order level**

| Order                     | 0m_S   | 0m_M   | 0m_W   | 3m_S   | 3m_M   | 3m_W   | 0m     | 3m     |
|---------------------------|--------|--------|--------|--------|--------|--------|--------|--------|
| D_3_Verrucomicrobiales    | 0      | 0      | 0.017  | 7.549  | 14.915 | 8.123  | 0.006  | 10.196 |
| D_3_Bacteroidales         | 56.093 | 53.920 | 63.628 | 52.024 | 43.852 | 49.372 | 57.881 | 48.416 |
| D_3_Clostridiales         | 36.684 | 38.674 | 29.873 | 30.437 | 32.948 | 32.293 | 35.077 | 31.893 |
| D_3_Erysipelotrichales    | 0.943  | 1.396  | 0.695  | 4.538  | 3.467  | 4.969  | 1.011  | 4.325  |
| D_3_Saccharimonadales     | 3.240  | 2.791  | 2.030  | 0.510  | 0.373  | 0.129  | 2.687  | 0.337  |
| D_3_Lactobacillales       | 2.489  | 2.499  | 3.370  | 1.267  | 1.211  | 1.234  | 2.786  | 1.237  |
| D_3_Bifidobacteriales     | 0      | 0.193  | 0.004  | 0.733  | 0.515  | 0.846  | 0.066  | 0.698  |
| D_3_Coriobacteriales      | 0.055  | 0.074  | 0.070  | 0.194  | 0.183  | 0.247  | 0.066  | 0.208  |
| D_3_Desulfovibrionales    | 0.139  | 0.192  | 0.124  | 0.245  | 0.306  | 0.371  | 0.152  | 0.308  |
| D_3_Betaproteobacteriales | 0.005  | 0.003  | 0.005  | 1.206  | 1.011  | 1.432  | 0.004  | 1.216  |
| D_3_Anaeroplasmatales     | 0      | 0.002  | 0      | 0.326  | 0.291  | 0.071  | 0.001  | 0.229  |
| D_3_Mollicutes RF39       | 0.158  | 0.113  | 0.055  | 0.283  | 0.276  | 0.160  | 0.109  | 0.239  |
| D_3_Rhodospirillales      | 0      | 0      | 0      | 0.366  | 0.341  | 0.448  | 0      | 0.385  |
| D_3_Gastranaerophilales   | 0      | 0      | 0      | 0.230  | 0.206  | 0.239  | 0      | 0.225  |
| Other < 0.5%              | 0.195  | 0.142  | 0.129  | 0.092  | 0.104  | 0.066  | 0.155  | 0.087  |

0m represents before the FMT, and 3m represents 3 months after the FMT. S, M, and W represent the SMS group, MMS group, and WMS group respectively.

**Table S5. Comparison of taxonomy abundance at the family level**

| Family                             | 0m_S   | 0m_M   | 0m_W   | 3m_S   | 3m_M   | 3m_W   | 0m     | 3m     |
|------------------------------------|--------|--------|--------|--------|--------|--------|--------|--------|
| D_4__Akkermansiaceae               | 0      | 0      | 0.017  | 7.555  | 14.923 | 8.129  | 0.006  | 10.202 |
| D_4__Muribaculaceae                | 54.598 | 50.660 | 61.670 | 40.613 | 33.303 | 40.784 | 55.642 | 38.233 |
| D_4__Lachnospiraceae               | 24.471 | 24.611 | 19.667 | 16.383 | 18.101 | 19.080 | 22.916 | 17.855 |
| D_4__Erysipelotrichaceae           | 0.944  | 1.397  | 0.695  | 4.542  | 3.469  | 4.972  | 1.012  | 4.327  |
| D_4__Saccharimonadaceae            | 3.241  | 2.793  | 2.030  | 0.510  | 0.373  | 0.129  | 2.688  | 0.337  |
| D_4__Tannerellaceae                | 1.259  | 2.107  | 1.615  | 0.653  | 0.706  | 0.822  | 1.661  | 0.727  |
| D_4__Lactobacillaceae              | 2.466  | 2.476  | 3.360  | 1.249  | 1.205  | 1.232  | 2.767  | 1.228  |
| D_4__Ruminococcaceae               | 9.720  | 10.737 | 7.399  | 12.561 | 13.346 | 11.583 | 9.285  | 12.497 |
| D_4__Prevotellaceae                | 0      | 0      | 0      | 4.028  | 3.089  | 3.013  | 0      | 3.377  |
| D_4__Bacteroidaceae                | 0      | 0.793  | 0      | 2.703  | 3.156  | 1.975  | 0.264  | 2.611  |
| D_4__Clostridiales vadinBB60 group | 1.670  | 1.526  | 1.391  | 0.852  | 0.859  | 0.798  | 1.529  | 0.836  |
| D_4__Rikenellaceae                 | 0.253  | 0.384  | 0.357  | 3.431  | 3.484  | 2.006  | 0.331  | 2.974  |
| D_4__Bifidobacteriaceae            | 0      | 0.193  | 0.004  | 0.733  | 0.516  | 0.846  | 0.066  | 0.698  |
| D_4__Atopobiaceae                  | 0      | 0      | 0      | 0.139  | 0.118  | 0.177  | 0      | 0.145  |
| D_4__Desulfovibrionaceae           | 0.139  | 0.193  | 0.124  | 0.246  | 0.306  | 0.371  | 0.152  | 0.308  |
| D_4__Peptococcaceae                | 0.191  | 0.164  | 0.154  | 0.328  | 0.396  | 0.533  | 0.170  | 0.419  |
| D_4__Burkholderiaceae              | 0.005  | 0.003  | 0.005  | 1.207  | 1.011  | 1.433  | 0.004  | 1.217  |
| D_4__Clostridiaceae 1              | 0.193  | 0.710  | 0.728  | 0.155  | 0.079  | 0.090  | 0.544  | 0.108  |
| D_4__Marinifilaceae                | 0      | 0      | 0      | 0.629  | 0.115  | 0.790  | 0      | 0.511  |
| D_4__Anaeroplasmataceae            | 0      | 0.002  | 0      | 0.326  | 0.291  | 0.071  | 0.001  | 0.229  |
| D_4__Peptostreptococcaceae         | 0.257  | 0.761  | 0.375  | 0.007  | 0.004  | 0.025  | 0.464  | 0.012  |
| D_4__uncultured bacterium          | 0.094  | 0.068  | 0.038  | 0.162  | 0.194  | 0.083  | 0.067  | 0.146  |
| D_4__uncultured                    | 0      | 0      | 0      | 0.366  | 0.341  | 0.449  | 0      | 0.385  |
| D_4__uncultured bacterium          | 0      | 0      | 0      | 0.193  | 0.183  | 0.178  | 0      | 0.185  |
| Other < 0.5%                       | 0.499  | 0.423  | 0.371  | 0.431  | 0.432  | 0.429  | 0.431  | 0.431  |

0m represents before the FMT, and 3m represents 3 months after the FMT. S, M, and W represent the SMS group, MMS group, and WMS group respectively.

**Table S6. Comparison of taxonomy abundance at the genus level**

| Genus                                     | 0m_S   | 0m_M   | 0m_W   | 3m_S   | 3m_M   | 3m_W   | 0m     | 3m     |
|-------------------------------------------|--------|--------|--------|--------|--------|--------|--------|--------|
| D_5_Akkermansia                           | 0      | 0      | 0.027  | 8.155  | 16.339 | 8.986  | 0.009  | 11.160 |
| Ambiguous_taxa                            | 3.231  | 3.854  | 4.155  | 13.325 | 8.853  | 11.553 | 3.747  | 11.243 |
| D_5_uncultured organism                   | 18.135 | 15.826 | 18.326 | 0.807  | 0.426  | 0.539  | 17.429 | 0.591  |
| D_5_uncultured bacterium                  | 30.406 | 26.769 | 33.544 | 15.306 | 14.418 | 18.109 | 30.240 | 15.944 |
| D_5_Turicibacter                          | 0.828  | 1.496  | 0.753  | 1.994  | 1.106  | 1.725  | 1.026  | 1.608  |
| D_5_uncultured Bacteroidales bacterium    | 1.692  | 1.868  | 2.096  | 7.325  | 6.403  | 7.555  | 1.885  | 7.094  |
| D_5_Lachnospiraceae NK4A136 group         | 7.477  | 7.965  | 7.540  | 10.866 | 11.389 | 12.565 | 7.661  | 11.607 |
| D_5_[Eubacterium] coprostanoligenes group | 0.027  | 0.057  | 0.018  | 0.681  | 0.789  | 0.951  | 0.034  | 0.807  |
| D_5_Candidatus Saccharimonas              | 4.351  | 3.665  | 2.690  | 0.584  | 0.416  | 0.147  | 3.568  | 0.382  |
| D_5_Parabacteroides                       | 1.681  | 2.684  | 2.136  | 0.753  | 0.791  | 0.953  | 2.167  | 0.832  |
| D_5_Lactobacillus                         | 3.346  | 3.125  | 4.527  | 1.412  | 1.339  | 1.410  | 3.666  | 1.387  |
| D_5_Ruminiclostridium                     | 3.731  | 3.249  | 1.929  | 0.624  | 0.701  | 0.508  | 2.970  | 0.611  |
| D_5_Alloprevotella                        | 0      | 0      | 0      | 1.522  | 1.517  | 1.476  | 0      | 1.505  |
| D_5_Bacteroides                           | 0      | 1.033  | 0      | 3.044  | 3.514  | 2.223  | 0.344  | 2.927  |
| D_5_uncultured bacterium                  | 0.987  | 1.066  | 0.947  | 0.475  | 0.476  | 0.497  | 1.000  | 0.483  |
| D_5_Alistipes                             | 0.336  | 0.494  | 0.464  | 2.548  | 3.755  | 1.699  | 0.432  | 2.667  |
| D_5_Faecalibaculum                        | 0.419  | 0.214  | 0.024  | 0.375  | 0.503  | 0.854  | 0.219  | 0.577  |
| D_5_Prevotellaceae UCG-001                | 0      | 0      | 0      | 1.851  | 1.353  | 0.881  | 0      | 1.361  |
| D_5_Muribaculum                           | 0      | 0.072  | 0      | 1.069  | 1.094  | 1.180  | 0.024  | 1.114  |
| D_5_Bifidobacterium                       | 0      | 0.258  | 0.005  | 0.817  | 0.571  | 0.967  | 0.088  | 0.785  |
| D_5_Intestinimonas                        | 1.744  | 1.626  | 0.990  | 0.186  | 0.172  | 0.139  | 1.453  | 0.166  |
| D_5_Coriobacteriaceae UCG-002             | 0      | 0      | 0      | 0.159  | 0.132  | 0.197  | 0      | 0.163  |
| D_5_Dubosiella                            | 0      | 0      | 0.134  | 2.501  | 1.866  | 2.836  | 0.045  | 2.401  |
| D_5_Desulfovibrio                         | 0.185  | 0.247  | 0.169  | 0.055  | 0.069  | 0.037  | 0.200  | 0.054  |
| D_5_Ruminococcaceae UCG-014               | 1.714  | 2.268  | 2.806  | 7.110  | 6.026  | 5.567  | 2.263  | 6.234  |
| D_5_uncultured                            | 5.789  | 6.293  | 4.524  | 1.534  | 1.401  | 1.578  | 5.535  | 1.504  |
| D_5_[Eubacterium] ventriosum group        | 0.059  | 0.523  | 0.222  | 0.001  | 0.045  | 0.004  | 0.268  | 0.017  |
| D_5_Oscillibacter                         | 1.119  | 1.054  | 0.748  | 0.551  | 0.539  | 0.445  | 0.974  | 0.512  |
| D_5_Prevotellaceae NK3B31 group           | 0      | 0      | 0      | 0.878  | 0.236  | 0.662  | 0      | 0.592  |
| D_5_[Eubacterium] ruminantium group       | 0      | 0      | 0      | 0.175  | 0.176  | 0.505  | 0      | 0.285  |
| D_5_uncultured                            | 0.453  | 0.601  | 0.336  | 0.929  | 1.164  | 1.270  | 0.463  | 1.121  |
| Ambiguous_taxa                            | 1.030  | 0.701  | 0.591  | 0.261  | 0.314  | 0.259  | 0.774  | 0.278  |
| D_5_Blautia                               | 0.512  | 0.400  | 0.227  | 0.223  | 0.401  | 0.387  | 0.380  | 0.337  |
| D_5_Ruminiclostridium 9                   | 1.554  | 1.383  | 1.153  | 1.081  | 1.302  | 1.025  | 1.364  | 1.136  |
| D_5_Rikenellaceae RC9 gut group           | 0      | 0      | 0      | 1.256  | 0.142  | 0.480  | 0      | 0.626  |
| D_5_uncultured                            | 0      | 0      | 0      | 0.153  | 0.198  | 0.317  | 0      | 0.223  |
| D_5_[Eubacterium] xylanophilum group      | 0.501  | 0.502  | 0.421  | 0.252  | 0.321  | 0.266  | 0.475  | 0.280  |
| D_5_Lachnospiraceae UCG-001               | 1.064  | 1.030  | 0.910  | 0.115  | 0.205  | 0.076  | 1.001  | 0.132  |
| D_5_uncultured                            | 0.241  | 0.191  | 0.183  | 0.359  | 0.439  | 0.589  | 0.205  | 0.462  |
| D_5_uncultured Clostridia bacterium       | 0.109  | 0.145  | 0.181  | 0.020  | 0.027  | 0.010  | 0.145  | 0.019  |
| D_5_Marvinbryantia                        | 0.383  | 0.453  | 0.654  | 0.101  | 0.037  | 0.028  | 0.496  | 0.056  |
| D_5_Parasutterella                        | 0      | 0      | 0      | 1.353  | 1.116  | 1.603  | 0      | 1.357  |
| D_5_Ruminococcaceae UCG-009               | 0.283  | 0.345  | 0.277  | 0.151  | 0.192  | 0.129  | 0.302  | 0.157  |
| D_5_Ruminococcus 1                        | 0.008  | 0.794  | 0.008  | 1.032  | 1.457  | 1.271  | 0.270  | 1.254  |
| D_5_Prevotellaceae Ga6A1 group            | 0      | 0      | 0      | 0.327  | 0.093  | 0.307  | 0      | 0.242  |



|                                 |       |       |       |       |       |       |       |       |
|---------------------------------|-------|-------|-------|-------|-------|-------|-------|-------|
| D_5_Ruminiclostridium 6         | 0.358 | 0.331 | 0.211 | 0.167 | 0.395 | 0.174 | 0.300 | 0.245 |
| D_5_Clostridium sensu stricto 1 | 0.259 | 0.852 | 0.982 | 0.107 | 0.039 | 0.068 | 0.698 | 0.071 |
| D_5_Roseburia                   | 0.683 | 0.584 | 0.427 | 0.338 | 0.350 | 0.251 | 0.565 | 0.313 |
| D_5_Lachnoclostridium           | 0.706 | 0.535 | 0.532 | 0.199 | 0.348 | 0.152 | 0.591 | 0.233 |
| D_5_GCA-900066575               | 0.744 | 0.692 | 0.648 | 0.123 | 0.192 | 0.111 | 0.695 | 0.142 |
| D_5_Odoribacter                 | 0     | 0     | 0     | 0.656 | 0.069 | 0.781 | 0     | 0.502 |
| D_5_Ileibacterium               | 0     | 0     | 0     | 0.068 | 0.186 | 0.112 | 0     | 0.122 |
| D_5_A2                          | 0.531 | 0.410 | 0.473 | 0.115 | 0.086 | 0.044 | 0.471 | 0.082 |
| D_5_Anaeroplasma                | 0     | 0.003 | 0     | 0.369 | 0.325 | 0.084 | 0.001 | 0.259 |
| D_5_Lachnospira                 | 0.268 | 0.328 | 0.309 | 0.010 | 0.002 | 0     | 0.302 | 0.004 |
| D_5_Romboutsia                  | 0.344 | 1.032 | 0.503 | 0.008 | 0.004 | 0.030 | 0.626 | 0.014 |
| D_5_Ruminiclostridium 5         | 0.417 | 0.761 | 0.309 | 0.159 | 0.245 | 0.167 | 0.496 | 0.190 |
| D_5_Anaerostipes                | 0     | 0     | 0     | 0.328 | 0.368 | 0.251 | 0     | 0.315 |
| D_5_uncultured                  | 0.006 | 0.051 | 0.002 | 0.105 | 0.079 | 0.051 | 0.020 | 0.078 |
| D_5_Ruminococcaceae UCG-010     | 0.036 | 0.065 | 0.044 | 0.279 | 0.184 | 0.292 | 0.048 | 0.252 |
| D_5_Tyzzereella 3               | 0.242 | 0.231 | 0.153 | 0.023 | 0.024 | 0.014 | 0.209 | 0.020 |
| D_5_uncultured bacterium        | 0.126 | 0.091 | 0.053 | 0.186 | 0.218 | 0.099 | 0.090 | 0.167 |
| D_5_Acetatifactor               | 0.165 | 0.148 | 0.131 | 0.075 | 0.122 | 0.098 | 0.148 | 0.098 |
| D_5_Azospirillum sp. 47_25      | 0     | 0     | 0     | 0.250 | 0.112 | 0.183 | 0     | 0.182 |
| D_5_Prevotellaceae UCG-003      | 0     | 0     | 0     | 0     | 0.206 | 0.044 | 0     | 0.084 |
| D_5_uncultured bacterium        | 0     | 0     | 0     | 0.209 | 0.202 | 0.194 | 0     | 0.202 |
| D_5_uncultured rumen bacterium  | 0     | 0     | 0     | 0.070 | 0.097 | 0.105 | 0     | 0.090 |
| D_5_Rikenella                   | 0     | 0     | 0     | 0.077 | 0.001 | 0.100 | 0     | 0.059 |
| D_5_uncultured bacterium        | 0     | 0     | 0     | 0.078 | 0.076 | 0.035 | 0     | 0.063 |
| D_5_Ruminococcaceae UCG-005     | 0.032 | 0.097 | 0.026 | 0.026 | 0.048 | 0.022 | 0.051 | 0.032 |
| D_5_uncultured Barnesiella sp.  | 0     | 0     | 0     | 0.001 | 0.094 | 0.002 | 0     | 0.032 |
| Other < 0.5%                    | 1.686 | 1.540 | 1.480 | 1.674 | 2.109 | 1.776 | 1.569 | 1.853 |

0m represents before the FMT, and 3m represents 3 months after the FMT. S, M, and W represent the SMS group, MMS group, and WMS group respectively.

**Table S7. Comparison of taxonomy abundance at the species level**

| Species                                | 0m_S   | 0m_M   | 0m_W   | 3m_S   | 3m_M   | 3m_W   | 0m     | 3m     |
|----------------------------------------|--------|--------|--------|--------|--------|--------|--------|--------|
| D_6_uncultured bacterium               | 0      | 0      | 0.028  | 8.311  | 19.514 | 10.340 | 0.009  | 12.722 |
| Ambiguous_taxa                         | 3.708  | 4.633  | 4.852  | 16.394 | 10.441 | 13.672 | 4.398  | 13.502 |
| D_6_uncultured organism                | 20.844 | 19.096 | 21.358 | 1.033  | 0.509  | 0.633  | 20.433 | 0.725  |
| D_6_uncultured bacterium               | 34.862 | 32.425 | 39.085 | 18.909 | 17.378 | 21.369 | 35.457 | 19.219 |
| D_6_Turicibacter sp. LA61              | 0.930  | 1.765  | 0.871  | 2.441  | 1.323  | 2.051  | 1.189  | 1.938  |
| D_6_uncultured Bacteroidales bacterium | 1.954  | 2.239  | 2.460  | 8.975  | 7.588  | 8.965  | 2.218  | 8.509  |
| D_6_Trichinella pseudospiralis         | 0      | 0      | 0      | 2.426  | 3.390  | 1.644  | 0      | 2.487  |
| D_6_Lachnospiraceae bacterium 10-1     | 0      | 0      | 0      | 1.214  | 1.071  | 1.447  | 0      | 1.244  |
| D_6_uncultured bacterium               | 4.979  | 4.460  | 3.211  | 0.712  | 0.484  | 0.173  | 4.217  | 0.457  |
| D_6_uncultured Parabacteroides sp.     | 1.955  | 3.058  | 2.568  | 0.012  | 0.004  | 0.017  | 2.527  | 0.011  |
| D_6_Lactobacillus murinus              | 2.138  | 2.014  | 3.113  | 0.209  | 0.473  | 0.280  | 2.422  | 0.321  |
| D_6_uncultured rumen bacterium         | 0      | 0.195  | 0      | 1.712  | 1.454  | 0.841  | 0.065  | 1.335  |
| D_6_uncultured bacterium               | 4.342  | 3.956  | 2.314  | 0.747  | 0.835  | 0.585  | 3.537  | 0.722  |
| D_6_gut metagenome                     | 0      | 0      | 0      | 1.894  | 1.716  | 1.773  | 0      | 1.794  |
| D_6_uncultured bacterium               | 1.149  | 1.312  | 1.143  | 0.579  | 0.570  | 0.583  | 1.201  | 0.577  |
| D_6_uncultured bacterium               | 0.004  | 0.077  | 0      | 2.775  | 3.456  | 1.464  | 0.027  | 2.565  |
| D_6_uncultured bacterium               | 4.303  | 4.490  | 2.540  | 3.899  | 4.567  | 6.337  | 3.778  | 4.934  |
| D_6_uncultured bacterium               | 0.483  | 0.277  | 0.026  | 0.461  | 0.597  | 1.004  | 0.262  | 0.687  |
| D_6_uncultured bacterium               | 0      | 0.092  | 0      | 1.326  | 1.328  | 1.396  | 0.031  | 1.350  |
| D_6_uncultured bacterium               | 1.984  | 1.934  | 1.177  | 0.101  | 0.041  | 0.063  | 1.698  | 0.068  |
| D_6_uncultured bacterium               | 0      | 0      | 0      | 1.784  | 2.074  | 3.050  | 0      | 2.303  |
| D_6_uncultured bacterium               | 0.214  | 0.296  | 0.200  | 0.069  | 0.054  | 0.028  | 0.237  | 0.050  |
| D_6_Clostridiales bacterium CIEAF 020  | 0      | 0      | 0      | 0.467  | 0.822  | 0.813  | 0      | 0.701  |
| D_6_Bacteroides caecimuris             | 0      | 0      | 0      | 0.845  | 0.436  | 0.659  | 0      | 0.647  |
| D_6_Bacteroides acidifaciens           | 0      | 0      | 0      | 0.315  | 0.095  | 0.078  | 0      | 0.163  |
| D_6_uncultured bacterium               | 0.702  | 0.832  | 0.544  | 0.488  | 0.322  | 0.324  | 0.693  | 0.378  |
| D_6_uncultured bacterium               | 0      | 0      | 0      | 1.095  | 0.287  | 0.781  | 0      | 0.721  |
| D_6_uncultured bacterium               | 2.870  | 3.134  | 2.323  | 1.021  | 1.233  | 1.352  | 2.775  | 1.202  |
| D_6_uncultured bacterium               | 0      | 0      | 0      | 0.229  | 0.213  | 0.588  | 0      | 0.343  |
| D_6_Clostridium sp. Culture-1          | 0.176  | 0.252  | 0.103  | 0.870  | 1.158  | 1.163  | 0.177  | 1.064  |
| Ambiguous_taxa                         | 1.202  | 0.863  | 0.719  | 0.321  | 0.378  | 0.306  | 0.928  | 0.335  |
| D_6_unidentified                       | 0.242  | 0.406  | 0.555  | 0.320  | 0.192  | 0.160  | 0.401  | 0.224  |
| D_6_uncultured Bacteroidales bacterium | 0      | 0.149  | 0      | 0.639  | 0.401  | 0.900  | 0.050  | 0.647  |
| D_6_uncultured Clostridiales bacterium | 0.527  | 0.400  | 0.393  | 1.255  | 0.634  | 0.974  | 0.440  | 0.954  |
| Ambiguous_taxa                         | 0      | 0      | 0      | 1.535  | 0.155  | 0.543  | 0      | 0.744  |
| Ambiguous_taxa                         | 0      | 0      | 0      | 0.184  | 0.233  | 0.372  | 0      | 0.263  |
| D_6_uncultured bacterium               | 0.577  | 0.618  | 0.504  | 0.310  | 0.393  | 0.312  | 0.566  | 0.338  |
| D_6_uncultured bacterium               | 1.225  | 1.240  | 1.068  | 0.097  | 0.218  | 0.058  | 1.178  | 0.125  |
| D_6_uncultured organism                | 0      | 0      | 0      | 0.275  | 0.332  | 0.539  | 0      | 0.382  |
| D_6_unidentified                       | 0.353  | 0.273  | 0.236  | 0.114  | 0.160  | 0.114  | 0.287  | 0.129  |
| D_6_Parabacteroides distasonis         | 0      | 0      | 0      | 0.126  | 0.338  | 0.100  | 0      | 0.188  |
| D_6_Lachnospiraceae bacterium COE1     | 0.396  | 0.331  | 0.263  | 0.245  | 0.239  | 0.320  | 0.330  | 0.268  |
| D_6_uncultured Clostridia bacterium    | 0.127  | 0.175  | 0.220  | 0.025  | 0.033  | 0.012  | 0.174  | 0.023  |
| D_6_uncultured bacterium               | 0.384  | 0.470  | 0.692  | 0.099  | 0.022  | 0      | 0.516  | 0.040  |
| D_6_uncultured bacterium               | 0      | 0      | 0      | 0.545  | 0.357  | 0.338  | 0      | 0.413  |
| Ambiguous_taxa                         | 0.326  | 0.423  | 0.329  | 0.178  | 0.224  | 0.138  | 0.359  | 0.180  |
| D_6_uncultured bacterium               | 0.279  | 0.233  | 0.220  | 0.163  | 0.191  | 0.169  | 0.244  | 0.174  |

|                                           |       |       |       |       |       |       |       |       |
|-------------------------------------------|-------|-------|-------|-------|-------|-------|-------|-------|
| D_6__Firmicutes bacterium M10-2           | 0     | 0     | 0.142 | 1.235 | 0.062 | 0.183 | 0.047 | 0.493 |
| Ambiguous_taxa                            | 0     | 0     | 0     | 0.411 | 0.107 | 0.345 | 0     | 0.288 |
| D_6__uncultured bacterium                 | 0.806 | 0.720 | 0.645 | 0.888 | 1.143 | 0.783 | 0.724 | 0.938 |
| D_6__uncultured bacterium                 | 0.386 | 0.204 | 0.317 | 1.482 | 1.093 | 1.099 | 0.302 | 1.225 |
| D_6__uncultured bacterium                 | 0     | 0     | 0     | 0.164 | 0.428 | 0.102 | 0     | 0.231 |
| D_6__uncultured bacterium                 | 0.296 | 1.022 | 1.163 | 0.129 | 0.048 | 0.079 | 0.827 | 0.086 |
| D_6__uncultured bacterium                 | 0.425 | 0.363 | 0.337 | 0.113 | 0.101 | 0.060 | 0.375 | 0.091 |
| D_6__uncultured bacterium                 | 0.414 | 0.266 | 0.362 | 0.138 | 0.360 | 0.106 | 0.347 | 0.201 |
| D_6__uncultured bacterium                 | 0.452 | 0.378 | 0.446 | 0.114 | 0.166 | 0.072 | 0.425 | 0.117 |
| D_6__uncultured bacterium                 | 0     | 0     | 0     | 0.572 | 0     | 0.538 | 0     | 0.370 |
| D_6__Lactobacillus reuteri                | 0.207 | 0.138 | 0.175 | 0.144 | 0.081 | 0.145 | 0.173 | 0.123 |
| Ambiguous_taxa                            | 0     | 0     | 0     | 0.080 | 0.228 | 0.128 | 0     | 0.145 |
| D_6__Lachnospiraceae bacterium A2         | 0.412 | 0.311 | 0.360 | 0     | 0.003 | 0     | 0.361 | 0.001 |
| Ambiguous_taxa                            | 0.238 | 0.460 | 0.198 | 0.102 | 0.070 | 0.077 | 0.298 | 0.083 |
| D_6__uncultured bacterium                 | 0     | 0.004 | 0     | 0.441 | 0.395 | 0.100 | 0.001 | 0.312 |
| D_6__uncultured bacterium                 | 0     | 0     | 0     | 0.165 | 0.728 | 0.566 | 0     | 0.486 |
| D_6__Burkholderiales bacterium YL45       | 0     | 0     | 0     | 0.794 | 0.614 | 1.217 | 0     | 0.875 |
| D_6__uncultured organism                  | 0     | 0.324 | 0.090 | 0     | 0     | 0     | 0.138 | 0.000 |
| D_6__mouse gut metagenome                 | 0.352 | 0.264 | 0.169 | 0     | 0     | 0     | 0.261 | 0.000 |
| Ambiguous_taxa                            | 0     | 0     | 0     | 0.320 | 0.310 | 0.199 | 0     | 0.276 |
| D_6__uncultured bacterium                 | 0.007 | 0.064 | 0.003 | 0.128 | 0.093 | 0.059 | 0.024 | 0.093 |
| D_6__unidentified                         | 0.212 | 0.282 | 0.211 | 0.038 | 0.041 | 0.035 | 0.235 | 0.038 |
| D_6__Bacteroides thetaiotaomicron         | 0     | 0     | 0     | 0.085 | 0.101 | 0.041 | 0     | 0.076 |
| Ambiguous_taxa                            | 0     | 0     | 0     | 0.161 | 0.073 | 0.372 | 0     | 0.202 |
| D_6__Clostridium sp. Culture-27           | 0.140 | 0.321 | 0.231 | 0.026 | 0.023 | 0.041 | 0.231 | 0.030 |
| D_6__uncultured bacterium                 | 0.147 | 0.107 | 0.060 | 0.231 | 0.252 | 0.118 | 0.105 | 0.200 |
| Ambiguous_taxa                            | 0.192 | 0.181 | 0.159 | 0.005 | 0.001 | 0     | 0.178 | 0.002 |
| D_6__Azospirillum sp. 47_25               | 0     | 0     | 0     | 0.317 | 0.137 | 0.216 | 0     | 0.223 |
| D_6__gut metagenome                       | 0     | 0     | 0     | 0.062 | 0.382 | 0.315 | 0     | 0.253 |
| D_6__uncultured Ruminococcaceae bacterium | 0     | 0.215 | 0.003 | 0.058 | 0.019 | 0.045 | 0.073 | 0.041 |
| D_6__uncultured bacterium                 | 0     | 0     | 0     | 0     | 0.251 | 0.052 | 0     | 0.101 |
| D_6__uncultured bacterium                 | 0.203 | 0.194 | 0.195 | 0.032 | 0.103 | 0.046 | 0.197 | 0.060 |
| D_6__uncultured bacterium                 | 0     | 0     | 0     | 0.205 | 0.219 | 0.131 | 0     | 0.185 |
| D_6__uncultured rumen bacterium           | 0.056 | 0.017 | 0     | 0.054 | 0.040 | 0.043 | 0.025 | 0.045 |
| D_6__uncultured bacterium                 | 0     | 0     | 0     | 0.286 | 0.231 | 0.225 | 0     | 0.248 |
| D_6__Bacteroides massiliensis B84634      | 0     | 0     | 0     | 0.137 | 0.519 | 0.187 | 0     | 0.281 |
| D_6__uncultured rumen bacterium           | 0     | 0     | 0     | 0.085 | 0.115 | 0.123 | 0     | 0.108 |
| Ambiguous_taxa                            | 0     | 0     | 0     | 0.099 | 0     | 0.117 | 0     | 0.072 |
| D_6__uncultured bacterium                 | 0     | 0.040 | 0     | 0.084 | 0.227 | 0.431 | 0.013 | 0.247 |
| D_6__uncultured bacterium                 | 0     | 0     | 0     | 0.094 | 0.091 | 0.041 | 0     | 0.075 |
| D_6__uncultured bacterium                 | 0.012 | 0.026 | 0.127 | 0     | 0     | 0     | 0.055 | 0.000 |
| D_6__gut metagenome                       | 0     | 0     | 0     | 0.062 | 0.101 | 0.060 | 0     | 0.075 |
| Ambiguous_taxa                            | 0     | 0     | 0     | 0.015 | 0.063 | 0     | 0     | 0.026 |
| Ambiguous_taxa                            | 0     | 0     | 0     | 0.011 | 0.259 | 0.084 | 0     | 0.118 |
| D_6__uncultured Barnesiella sp.           | 0     | 0     | 0     | 0.002 | 0.116 | 0.002 | 0     | 0.040 |
| D_6__uncultured Clostridiales bacterium   | 0     | 0     | 0     | 0.124 | 0.050 | 0.009 | 0     | 0.061 |
| Ambiguous_taxa                            | 0     | 0     | 0     | 0.110 | 0     | 0.006 | 0     | 0.039 |
| Other < 0.5%                              | 1.806 | 1.983 | 1.497 | 2.454 | 2.625 | 2.574 | 1.762 | 2.551 |

0m represents before the FMT, and 3m represents 3 months after the FMT. S, M, and W represent the SMS group, MMS group, and WMS group respectively.

**Table S8. The  $\alpha$ -diversity indexes for each sample and group**

| Sample  | Observed | ACE    | Shannon | Simpson | InvSimpson | Fisher |
|---------|----------|--------|---------|---------|------------|--------|
| 0m_S_01 | 189      | 189    | 4.00    | 0.959   | 24.51      | 26.03  |
| 0m_S_02 | 217      | 217    | 4.44    | 0.978   | 44.45      | 29.98  |
| 0m_S_03 | 206      | 206.15 | 4.10    | 0.965   | 28.67      | 28.21  |
| 0m_S_04 | 208      | 208    | 4.02    | 0.958   | 23.63      | 28.25  |
| 0m_S_05 | 200      | 200.19 | 4.02    | 0.965   | 28.61      | 27.12  |
| 0m_S_06 | 210      | 210    | 4.26    | 0.973   | 37.50      | 28.51  |
| 0m_S_07 | 181      | 181.21 | 3.83    | 0.957   | 23.27      | 23.87  |
| 0m_S_08 | 236      | 236.59 | 4.52    | 0.979   | 48.27      | 33.16  |
| 0m_S_09 | 193      | 193    | 4.10    | 0.966   | 29.60      | 26.73  |
| 0m_S_10 | 199      | 199.93 | 4.19    | 0.967   | 30.16      | 27.52  |
| 0m_M_01 | 212      | 212.47 | 4.29    | 0.972   | 36.12      | 29.26  |
| 0m_M_02 | 224      | 224.25 | 3.86    | 0.944   | 17.86      | 30.20  |
| 0m_M_03 | 197      | 197.22 | 4.06    | 0.969   | 32.29      | 27.13  |
| 0m_M_04 | 245      | 245    | 4.54    | 0.977   | 42.60      | 34.12  |
| 0m_M_05 | 265      | 268.24 | 4.64    | 0.983   | 58.74      | 37.88  |
| 0m_M_06 | 245      | 245    | 4.44    | 0.975   | 40.33      | 32.49  |
| 0m_M_07 | 223      | 223.35 | 4.03    | 0.958   | 24.01      | 29.70  |
| 0m_M_08 | 201      | 201    | 4.19    | 0.973   | 36.42      | 28.32  |
| 0m_M_09 | 194      | 194.64 | 4.03    | 0.966   | 29.34      | 26.57  |
| 0m_M_10 | 177      | 177.21 | 3.85    | 0.956   | 22.68      | 23.57  |
| 0m_W_01 | 208      | 209.31 | 4.23    | 0.973   | 36.46      | 28.80  |
| 0m_W_02 | 171      | 171    | 3.61    | 0.943   | 17.47      | 22.31  |
| 0m_W_03 | 152      | 152    | 3.51    | 0.949   | 19.79      | 19.27  |
| 0m_W_04 | 213      | 213.30 | 4.29    | 0.972   | 35.45      | 29.21  |
| 0m_W_05 | 202      | 202.51 | 4.22    | 0.973   | 37.19      | 27.28  |
| 0m_W_06 | 204      | 204.15 | 3.99    | 0.961   | 25.94      | 27.52  |
| 0m_W_07 | 217      | 217.43 | 4.16    | 0.967   | 29.92      | 29.26  |
| 0m_W_08 | 232      | 232.76 | 4.36    | 0.974   | 38.29      | 31.95  |
| 0m_W_09 | 162      | 162    | 3.64    | 0.952   | 20.98      | 20.68  |
| 0m_W_10 | 217      | 217    | 4.08    | 0.964   | 27.88      | 29.32  |
| 3m_S_01 | 303      | 303.81 | 4.46    | 0.976   | 41.91      | 45.01  |
| 3m_S_02 | 339      | 339.73 | 4.76    | 0.981   | 52.98      | 52.19  |
| 3m_S_03 | 410      | 411.15 | 4.66    | 0.972   | 35.20      | 62.43  |
| 3m_S_04 | 246      | 249.46 | 4.28    | 0.970   | 33.60      | 38.53  |
| 3m_S_05 | 249      | 250.11 | 3.83    | 0.938   | 16.08      | 36.56  |
| 3m_S_06 | 418      | 420.38 | 4.27    | 0.957   | 23.18      | 61.94  |
| 3m_S_07 | 386      | 386.31 | 4.61    | 0.969   | 32.24      | 59.04  |
| 3m_S_08 | 295      | 295.16 | 3.88    | 0.911   | 11.21      | 42.96  |
| 3m_S_09 | 377      | 377.16 | 4.69    | 0.977   | 44.18      | 56.91  |
| 3m_S_10 | 391      | 396.47 | 4.74    | 0.976   | 42.23      | 59.53  |
| 3m_M_01 | 307      | 309.10 | 4.23    | 0.955   | 22.34      | 46.82  |
| 3m_M_02 | 291      | 291.39 | 4.35    | 0.964   | 27.96      | 43.98  |
| 3m_M_03 | 389      | 389.74 | 4.54    | 0.964   | 27.55      | 58.11  |
| 3m_M_04 | 320      | 320.16 | 4.14    | 0.933   | 14.87      | 46.79  |
| 3m_M_05 | 402      | 402.56 | 5.00    | 0.987   | 79.86      | 62.24  |
| 3m_M_06 | 380      | 380.68 | 4.81    | 0.983   | 58.74      | 58.89  |
| 3m_M_07 | 352      | 352.17 | 4.32    | 0.964   | 28.07      | 53.30  |
| 3m_M_08 | 318      | 319.11 | 3.97    | 0.946   | 18.43      | 47.03  |
| 3m_M_09 | 343      | 344.93 | 3.58    | 0.882   | 8.49       | 49.63  |
| 3m_M_10 | 292      | 292.94 | 3.76    | 0.905   | 10.55      | 42.81  |
| 3m_W_01 | 313      | 313.32 | 4.37    | 0.969   | 31.94      | 47.09  |
| 3m_W_02 | 317      | 318.29 | 4.32    | 0.963   | 26.85      | 49.32  |
| 3m_W_03 | 389      | 392.35 | 4.23    | 0.931   | 14.54      | 58.76  |
| 3m_W_04 | 388      | 388.16 | 4.70    | 0.975   | 39.81      | 58.82  |
| 3m_W_05 | 334      | 334.40 | 4.07    | 0.924   | 13.23      | 50.21  |

|                |     |        |      |       |       |       |
|----------------|-----|--------|------|-------|-------|-------|
| <b>3m_W_06</b> | 270 | 270.76 | 4.12 | 0.935 | 15.28 | 43.19 |
| <b>3m_W_07</b> | 291 | 291.31 | 4.34 | 0.969 | 32.71 | 43.50 |
| <b>3m_W_08</b> | 326 | 326.56 | 4.43 | 0.967 | 29.89 | 50.19 |
| <b>3m_W_09</b> | 352 | 352.16 | 4.63 | 0.973 | 36.62 | 53.01 |
| <b>3m_W_10</b> | 294 | 294.92 | 4.13 | 0.956 | 22.53 | 43.41 |

| <b>Group</b> | <b>Observed</b> | <b>ACE</b>   | <b>Shannon</b> | <b>Simpson</b> | <b>InvSimpson</b> | <b>Fisher</b> |
|--------------|-----------------|--------------|----------------|----------------|-------------------|---------------|
| <b>0m_S</b>  | 203.9 ± 4.9     | 204.1 ± 4.9  | 4.15 ± 0.07    | 0.967 ± 0.002  | 31.9 ± 2.8        | 27.9 ± 0.8    |
| <b>0m_M</b>  | 218.3 ± 8.7     | 218.8 ± 8.8  | 4.19 ± 0.09    | 0.967 ± 0.004  | 34 ± 3.7          | 29.9 ± 1.3    |
| <b>0m_W</b>  | 197.8 ± 8.4     | 198.1 ± 8.5  | 4.01 ± 0.1     | 0.963 ± 0.004  | 28.9 ± 2.5        | 26.6 ± 1.3    |
| <b>3m_S</b>  | 341.4 ± 20.4    | 343 ± 20.5   | 4.42 ± 0.11    | 0.963 ± 0.007  | 33.3 ± 4.2        | 51.5 ± 3.1    |
| <b>3m_M</b>  | 339.4 ± 12.8    | 340.3 ± 12.7 | 4.27 ± 0.14    | 0.948 ± 0.011  | 29.7 ± 7.1        | 51 ± 2.1      |
| <b>3m_W</b>  | 327.4 ± 12.5    | 328.2 ± 12.7 | 4.33 ± 0.07    | 0.956 ± 0.006  | 26.3 ± 3          | 49.8 ± 1.8    |

0m represents before the FMT, and 3m represents 3 months after the FMT. S, M, and W represent the SMS group, MMS group, and WMS group respectively.

**Table S9. PERMANOVA result tables for group before and after FMT.**

| <b>Factor</b>     | <b><i>df</i></b> | <b>SS</b> | <b>MS</b> | <b>F</b> | <b><i>P</i>(perm)</b> |
|-------------------|------------------|-----------|-----------|----------|-----------------------|
| <b>Group (0m)</b> | 2                | 0.002865  | 0.0014326 | 1.1565   | 0.322                 |
| Residuals         | 27               | 0.033444  | 0.0012387 |          |                       |

| <b>Factor</b>     | <b><i>df</i></b> | <b>SS</b> | <b>MS</b> | <b>F</b> | <b><i>P</i>(perm)</b> |
|-------------------|------------------|-----------|-----------|----------|-----------------------|
| <b>Group (3m)</b> | 2                | 0.0017165 | 0.0008583 | 0.99     | 0.369                 |
| Residuals         | 27               | 0.0234057 | 0.0008669 |          |                       |

0m represents before the FMT, and 3m represents 3 months after the FMT. *df*: degrees of freedom; SS: sum of squares; MS: mean sum of squares; F: F value by permutation, *P*(perm): *p*-values based on more than 9000 permutations.

**Table S10. Co-occurrence network indices**

| <b>Network indexes indices</b> | <b>0m_S</b> | <b>0m_M</b> | <b>0m_W</b> | <b>3m_S</b> | <b>3m_M</b> | <b>3m_W</b> |
|--------------------------------|-------------|-------------|-------------|-------------|-------------|-------------|
| <b>Node</b>                    | 73          | 101         | 98          | 204         | 173         | 168         |
| <b>Edge</b>                    | 65          | 99          | 75          | 158         | 149         | 136         |
| <b>Network Density</b>         | 0.025       | 0.020       | 0.02        | 0.008       | 0.010       | 0.010       |
| <b>Assortativity</b>           | -0.019      | -0.014      | -0.013      | -0.007      | -0.008      | -0.008      |
| <b>Module</b>                  | 21          | 28          | 31          | 74          | 60          | 58          |
| <b>Modularity (lc)</b>         | 0.879       | 0.861       | 0.905       | 0.961       | 0.956       | 0.969       |

0m represents before the FMT, and 3m represents 3 months after the FMT. S, M, and W represent the SMS group, MMS group, and WMS group respectively.
